# Supplementary material for: The effect of monoamine oxidase-B inhibitors on the alleviation of depressive symptoms in Parkinson’s disease: meta-analysis of randomized controlled trials
Source: PubMed Central journal article supplement — Ther Adv Psychopharmacol. 2021 Jan 18;11:2045125320985993. doi: 10.1177/2045125320985993 (PMC7816524; doi:10.1177/2045125320985993), 2021-01-18
Supplement: sj-pdf-1-tpp-10.1177_2045125320985993.pdf [file sj-pdf-1-tpp-10.1177_2045125320985993.pdf]

## Supplementary information

Table S1. Searching strategy of PubMed database

| PubMed            |                                                                                                                                                                                                                                                                                                                                                                                                              |                                              |                                     |                  |                |                       |
|-------------------|--------------------------------------------------------------------------------------------------------------------------------------------------------------------------------------------------------------------------------------------------------------------------------------------------------------------------------------------------------------------------------------------------------------|----------------------------------------------|-------------------------------------|------------------|----------------|-----------------------|
| Type              | Searching Strategy                                                                                                                                                                                                                                                                                                                                                                                           | PubMed                                       | EMBASE                              | Cochrane Library | Web of Science | Scopus                |
| <b>Disease</b>    | "Parkinson Disease"[Mesh] OR<br>"Parkinson Disease"[tiab] OR "Idiopathic<br>Parkinson's Disease"[tiab] OR "Lewy<br>Body Parkinson Disease"[tiab] OR<br>"Lewy Body Parkinson's Disease"[tiab]<br>OR "Parkinson's Disease"[tiab] OR<br>"Idiopathic Parkinson Disease"[tiab] OR<br>"Paralysis Agitans"[tiab]                                                                                                    | 100386                                       | 155807                              | 9367             | 111208         | 145959                |
| <b>Treatments</b> | "Monoamine Oxidase Inhibitors"[Mesh]<br>OR "MAOI"[tiab] OR "MAOIs"[tiab]<br>OR "MAOI-A"[tiab] OR "MAOI-<br>B"[tiab] OR "Selegiline"[Mesh] OR<br>"selegiline"[tiab] OR "rasagiline"<br>[Supplementary Concept] OR<br>"rasagiline"[tiab] OR "safinamide"[tiab]                                                                                                                                                 | 12729                                        | 49907                               | 1405             | 8909           | 31461                 |
| <b>Design</b>     | ((double* [tw] OR trebl* [tw] OR tripl*<br>[tw]) AND (mask* [tw] OR blind* [tw]))<br>OR randomized controlled trial[pt] OR<br>controlled clinical trial[pt] OR<br>randomized controlled trial[mh] OR<br>randomized[tiab] OR placebo[tiab] OR<br>clinical trials as topic[mh] OR controlled<br>clinical trials as topic[mh] OR random<br>allocation[mh] OR randomization[tiab]<br>OR randomly allocated[tiab] | 115<br>MA&SR 4<br>Reviews 87<br><br>Final 25 | 94<br>MA&SR<br>Reviews<br><br>Final | Final 69         | Final 84       | 1347<br><br>Final 280 |
| <b>Condition</b>  | Depression<br>"depressive disorder"[MeSH Terms] OR                                                                                                                                                                                                                                                                                                                                                           | 494067                                       | 776354                              | 81164            | 471865         | 712571                |

|                                                                                               |  |  |  |  |  |
|-----------------------------------------------------------------------------------------------|--|--|--|--|--|
| "depression"[MeSH Terms] OR<br>depress*[Title/Abstract] OR depressed<br>mood[Title/Abstract]) |  |  |  |  |  |
|-----------------------------------------------------------------------------------------------|--|--|--|--|--|

(Parkinson Disease OR Parkinson's Disease OR Idiopathic Parkinson Disease OR Idiopathic Parkinson's Disease OR Lewy Body Parkinson Disease OR Lewy Body Parkinson's Disease OR Paralysis Agitans)

(Monoamine Oxidase Inhibitors OR MAOI OR MAOIs OR MAOI-A OR MAOI-B OR Selegiline OR rasagiline OR safinamide)

(depressive disorder OR depression OR depressed mood)

Table S2. Bias Assessment

| Study or subgroup                         | Allocation | Performance   | Attrition     | Measurement   | Reporting |
|-------------------------------------------|------------|---------------|---------------|---------------|-----------|
| Selegiline_The Parkinson study group_1989 | Low risk   | Low risk      | Some concerns | Low risk      | High risk |
| Selegiline_Allain_1991                    | Low risk   | Low risk      | Low risk      | Low risk      | High risk |
| safinamide_schapira_2013                  | Low risk   | Low risk      | Low risk      | Low risk      | High risk |
| Safinamide_Borghain_2014                  | Low risk   | Some concerns | Low risk      | Some concerns | High risk |
| Rasagiline_Barone_2015                    | Low risk   | Low risk      | Low risk      | Low risk      | Low risk  |
| safinamide_schapira_2016                  | Low risk   | Low risk      | Low risk      | Low risk      | High risk |

Table S3. Hoehn and Yahr Scale and Modified Hoehn and Yahr Scale

| Stage | Hoehn and Yahr Scale                                                                                   | Modified Hoehn and Yahr Scale                                                         |
|-------|--------------------------------------------------------------------------------------------------------|---------------------------------------------------------------------------------------|
| 1     | Unilateral involvement only usually with minimal or no functional disability                           | Unilateral involvement only                                                           |
| 1.5   | -                                                                                                      | Unilateral and axial involvement                                                      |
| 2     | Bilateral or midline involvement without impairment of balance                                         | Bilateral involvement without impairment of balance                                   |
| 2.5   | -                                                                                                      | Mild bilateral disease with recovery on pull test                                     |
| 3     | Bilateral disease: mild to moderate disability with impaired postural reflexes; physically independent | Mild to moderate bilateral disease; some postural instability; physically independent |
| 4     | Severely disabling disease; still able to walk or stand unassisted                                     | Severe disability; still able to walk or stand unassisted                             |
| 5     | Confinement to bed or wheelchair unless aided                                                          | Wheelchair bound or bedridden unless aided                                            |
